# Supplementary material
Source: ML conference proceedings conference paper supplement (https://aclanthology.org/2021.acl-long.67)
Supplement: OptionalSupplementaryMaterial [file lexind_acl.supp.pdf › lexind_acl.supp.pdf]

## F Comparison between MUSE and GEN-RTV

We present the word pairs involved in the comparison between MUSE benchmark and our GEN-RTV method in Table 11.

Table 11: Word pairs from the union of MUSE and GEN-RTV lexicon and manual judgments. M: entries from MUSE, G: entries from the GEN-RTV lexicon, B: entries from both sources.

| zh  | en          | Src. | Acc. |
|-----|-------------|------|------|
| ≥   | ≥           | B    | ✓    |
| 中共  | cpc         | M    | ✓    |
| 中共  | ccp         | M    | ✓    |
| 中西  | midwest     | M    | ✓    |
| 亞洲  | asia        | B    | ✓    |
| 亞洲  | asian       | B    | ✓    |
| 交換  | exchanged   | G    | ✓    |
| 交換  | exchanging  | G    | ✓    |
| 交換  | exchange    | B    | ✓    |
| 交換  | swap        | B    | ✓    |
| 仇恨  | hate        | B    | ✓    |
| 仇恨  | hatred      | B    | ✓    |
| 伊朗  | iran        | B    | ✓    |
| 伊朗  | iranian     | B    | ✓    |
| 估算  | estimates   | G    | ✓    |
| 估算  | estimate    | G    | ✓    |
| 估算  | estimation  | M    | ✓    |
| 估算  | estimating  | G    | ✓    |
| 估算  | estimated   | G    | ✓    |
| 佔有  | possession  | M    | ✓    |
| 佛教徒 | buddhist    | B    | ✓    |
| 佛教徒 | buddhists   | B    | ✓    |
| 依偎  | snuggle     | M    | ✓    |
| 依然  | still       | B    | ✓    |
| 修正  | amendment   | M    | ✓    |
| 修正  | corrected   | G    | ✓    |
| 修正  | amendments  | M    | ✓    |
| 修正  | amend       | M    | ✓    |
| 修正  | corrections | G    | ✓    |
| 俾斯麥 | bismarck    | B    | ✓    |
| 借調  | secondment  | M    | ✓    |
| 借調  | seconded    | B    | ✓    |
| 停車場 | parking     | B    | ✗    |
| 傻   | stupid      | B    | ✓    |
| 傻   | silly       | M    | ✓    |
| 光澤  | shiny       | G    | ✓    |
| 光澤  | gloss       | M    | ✓    |
| 公羊  | ram         | B    | ✓    |
| 公羊  | rams        | M    | ✓    |
| 凸顯  | highlight   | M    | ✓    |
| 出遊  | outing      | M    | ✓    |
| 出遊  | outings     | M    | ✓    |

Continued on next column

Table 11, Continued from previous column

| zh   | en          | Src. | Acc. |
|------|-------------|------|------|
| 前奏   | prelude     | B    | ✓    |
| 前奏   | foreplay    | M    | ✗    |
| 努    | nu          | M    | ✗    |
| 包租   | charters    | M    | ✓    |
| 包租   | charter     | M    | ✓    |
| 包租   | chartered   | M    | ✓    |
| 包租   | chartering  | M    | ✓    |
| 匈牙利語 | hungarian   | B    | ✓    |
| 匯款   | remittance  | B    | ✓    |
| 匯款   | remittances | B    | ✓    |
| 協約   | concordat   | M    | ✓    |
| 協約   | pact        | M    | ✓    |
| 協約   | compact     | M    | ✓    |
| 原木   | logs        | B    | ✓    |
| 參考   | reference   | B    | ✓    |
| 句法   | syntactic   | G    | ✓    |
| 句法   | syntax      | B    | ✓    |
| 同義字  | synonym     | B    | ✓    |
| 同義字  | synonyms    | M    | ✓    |
| 吱吱   | zee         | M    | ✗    |
| 吱吱   | squeaking   | M    | ✓    |
| 呼吸道  | respiratory | G    | ✓    |
| 呼吸道  | airway      | B    | ✓    |
| 命名   | named       | G    | ✓    |
| 命名   | naming      | B    | ✓    |
| 咖哩   | curry       | M    | ✓    |
| 哈爾濱  | harbin      | B    | ✓    |
| 問候   | greeting    | B    | ✓    |
| 問候   | greetings   | B    | ✓    |
| 喇叭   | horns       | G    | ✓    |
| 喇叭   | horn        | M    | ✓    |
| 嘔吐   | vomited     | G    | ✓    |
| 嘔吐   | vomit       | G    | ✓    |
| 嘔吐   | vomiting    | B    | ✓    |
| 嚴酷   | harsh       | B    | ✓    |
| 因此   | so          | M    | ✓    |
| 因此   | hence       | G    | ✓    |
| 因此   | therefore   | G    | ✓    |
| 因此   | thus        | G    | ✓    |
| 國家   | state       | M    | ✓    |
| 國家   | countries   | B    | ✓    |
| 國家   | country     | B    | ✓    |
| 國家   | national    | B    | ✓    |
| 國家   | states      | M    | ✓    |
| 地主   | landowners  | B    | ✓    |
| 地主   | landlords   | G    | ✓    |
| 地主   | landlord    | B    | ✓    |
| 地熱   | geothermal  | B    | ✓    |
| 地鐵   | metro       | B    | ✓    |
| 地鐵   | subway      | B    | ✓    |
| 增長   | growing     | G    | ✓    |

Continued on next column

Table 11, Continued from previous column

| zh   | en              | Src. | Acc. |
|------|-----------------|------|------|
| 增長   | growth          | B    | ✓    |
| 多雲   | cloudy          | B    | ✓    |
| 夜總會  | nightclub       | B    | ✓    |
| 夜總會  | nightclubs      | B    | ✓    |
| 大島   | oshima          | M    | ✓    |
| 奴隸制  | slavery         | B    | ✓    |
| 姐妹   | sister          | B    | ✓    |
| 姐妹   | sisters         | B    | ✓    |
| 媽祖   | mazu            | M    | ✓    |
| 嫉妒   | jealousy        | B    | ✓    |
| 嫉妒   | envy            | G    | ✓    |
| 嫉妒   | jealous         | B    | ✓    |
| 字面上  | literally       | B    | ✓    |
| 學位   | degrees         | B    | ✓    |
| 學位   | degree          | B    | ✓    |
| 安培   | ampere          | G    | ✓    |
| 安培   | amperes         | G    | ✓    |
| 安培   | amber           | M    | ✗    |
| 安迪   | andy            | B    | ✓    |
| 官邸   | residence       | G    | ✗    |
| 官邸   | mansion         | G    | ✗    |
| 官邸   | residences      | M    | ✗    |
| 客艙   | cabin           | B    | ✓    |
| 客艙   | cabins          | G    | ✓    |
| 家庭教師 | tutor           | G    | ✓    |
| 家庭教師 | governess       | B    | ✓    |
| 容器   | container       | B    | ✓    |
| 容器   | containers      | B    | ✓    |
| 寄生蟲  | parasites       | B    | ✓    |
| 寄生蟲  | parasite        | B    | ✓    |
| 寬大   | leniency        | M    | ✓    |
| 寬大   | clemency        | M    | ✓    |
| 專利權  | patents         | B    | ✓    |
| 專利權  | patent          | B    | ✓    |
| 小型   | small           | B    | ✓    |
| 小型   | smaller         | G    | ✓    |
| 小指   | pinky           | M    | ✓    |
| 小行星  | asteroid        | B    | ✓    |
| 小行星  | asteroids       | B    | ✓    |
| 層層   | layers          | B    | ✓    |
| 巡邏   | patrol          | B    | ✓    |
| 巡邏   | patrols         | B    | ✓    |
| 巡邏   | patrolled       | G    | ✓    |
| 巡邏   | patrolling      | B    | ✓    |
| 市鎮   | municipality    | G    | ✓    |
| 市鎮   | communes        | M    | ✓    |
| 市鎮   | municipalities  | B    | ✓    |
| 幻滅   | disillusionment | B    | ✓    |
| 幾十年  | decades         | B    | ✓    |
| 引用   | references      | G    | ✓    |
| 引用   | quote           | M    | ✓    |

Continued on next column

Table 11, Continued from previous column

| zh  | en          | Src. | Acc. |
|-----|-------------|------|------|
| 引用  | quoted      | M    | ✓    |
| 引用  | quotes      | M    | ✓    |
| 引用  | cited       | G    | ✓    |
| 引用  | cite        | G    | ✓    |
| 引用  | reference   | G    | ✓    |
| 彈性  | flexibility | B    | ✓    |
| 彈性  | flexible    | M    | ✓    |
| 彈性  | resilient   | G    | ✓    |
| 彈性  | flex        | M    | ✓    |
| 彈性  | elasticity  | B    | ✓    |
| 彈性  | elastic     | B    | ✓    |
| 形式  | forms       | G    | ✓    |
| 形式  | format      | M    | ✓    |
| 形式  | form        | B    | ✓    |
| 影像  | images      | B    | ✓    |
| 影像  | imaging     | B    | ✓    |
| 影像  | image       | B    | ✓    |
| 往下  | down        | M    | ✗    |
| 復活節 | easter      | B    | ✓    |
| 必需品 | essentials  | B    | ✓    |
| 必需品 | necessities | B    | ✓    |
| 必需品 | necessity   | G    | ✓    |
| 懷舊  | nostalgia   | B    | ✓    |
| 懷舊  | nostalgic   | B    | ✓    |
| 懷舊  | throwback   | M    | ✓    |
| 所有者 | owners      | B    | ✓    |
| 所有者 | owner       | B    | ✓    |
| 托兒所 | nursery     | B    | ✓    |
| 托兒所 | crèche      | M    | ✓    |
| 托兒所 | daycare     | M    | ✓    |
| 托兒所 | nurseries   | M    | ✓    |
| 托盤  | tray        | B    | ✓    |
| 托盤  | trays       | B    | ✓    |
| 托盤  | pallets     | G    | ✓    |
| 扣   | buckle      | M    | ✓    |
| 投影  | projective  | G    | ✓    |
| 投影  | projected   | G    | ✓    |
| 投影  | projections | G    | ✓    |
| 投影  | projection  | B    | ✓    |
| 抽籤  | draw        | B    | ✗    |
| 拉鏈  | zipper      | M    | ✓    |
| 拉鏈  | zippers     | G    | ✓    |
| 拉麵  | ramen       | M    | ✓    |
| 接吻  | kissing     | B    | ✓    |
| 接吻  | kiss        | G    | ✓    |
| 日本人 | japanese    | M    | ✓    |
| 晶格  | lattice     | B    | ✓    |
| 暴發  | outbreak    | M    | ✓    |
| 暴發  | outbreaks   | G    | ✓    |
| 曆   | calendars   | G    | ✓    |
| 曆   | calendar    | B    | ✓    |

Continued on next column

Table 11, Continued from previous column

| zh   | en            | Src. | Acc. |
|------|---------------|------|------|
| 曲軸   | crankshaft    | B    | ✓    |
| 曼谷   | bangkok       | B    | ✓    |
| 極    | polar         | M    | ✓    |
| 極    | extremely     | B    | ✓    |
| 樂器   | instrument    | B    | ✓    |
| 樂器   | instruments   | B    | ✓    |
| 樹枝   | branches      | M    | ✓    |
| 橋梁   | bridges       | B    | ✓    |
| 橋梁   | bridge        | B    | ✓    |
| 機遇   | opportunities | B    | ✓    |
| 機遇   | opportunity   | B    | ✓    |
| 橫濱   | yokohama      | M    | ✓    |
| 比薩   | pizza         | M    | ✓    |
| 比薩   | pisa          | G    | ✓    |
| 氣動   | pneumatic     | B    | ✓    |
| 氣動   | aerodynamic   | G    | ✓    |
| 決算   | resolutions   | G    | ✗    |
| 決算   | accounts      | M    | ✗    |
| 油漆   | paints        | B    | ✓    |
| 油漆   | paint         | B    | ✓    |
| 油菜   | canola        | M    | ✓    |
| 泡沫   | bubble        | M    | ✓    |
| 泡沫   | foam          | M    | ✓    |
| 泡沫   | bubbles       | M    | ✓    |
| 泥漿   | muds          | G    | ✓    |
| 泥漿   | mud           | B    | ✓    |
| 深不可測 | unfathomable  | M    | ✗    |
| 湯頭   | tonto         | M    | ✗    |
| 漆    | varnish       | M    | ✗    |
| 漆    | lacquer       | M    | ✓    |
| 漆    | paint         | G    | ✓    |
| 潛力   | potentials    | M    | ✓    |
| 潛力   | potential     | B    | ✓    |
| 濕疹   | eczema        | B    | ✓    |
| 火災   | fires         | B    | ✓    |
| 火災   | fire          | B    | ✓    |
| 烈    | yeol          | M    | ✗    |
| 焦點   | focus         | B    | ✓    |
| 照片   | pictures      | M    | ✓    |
| 照片   | photos        | B    | ✓    |
| 照片   | picture       | M    | ✓    |
| 照片   | photographs   | B    | ✓    |
| 照片   | photograph    | B    | ✓    |
| 照片   | photo         | B    | ✓    |
| 燒瓶   | flask         | B    | ✓    |
| 牛角   | horn          | M    | ✗    |
| 牛角   | horns         | M    | ✗    |
| 牡丹   | peony         | M    | ✓    |
| 玩    | play          | B    | ✓    |
| 玩    | playing       | B    | ✓    |
| 現任   | present       | M    | ✓    |

Continued on next column

Table 11, Continued from previous column

| zh  | en              | Src. | Acc. |
|-----|-----------------|------|------|
| 現任  | incumbent       | G    | ✓    |
| 現任  | current         | M    | ✓    |
| 理想  | ideals          | B    | ✓    |
| 理想  | ideally         | G    | ✓    |
| 理想  | ideal           | B    | ✓    |
| 田野  | fields          | M    | ✓    |
| 白蘭地 | brandy          | B    | ✓    |
| 百合  | lily            | M    | ✓    |
| 百合  | lilium          | M    | ✓    |
| 百合  | lilies          | M    | ✓    |
| 監視  | monitoring      | G    | ✓    |
| 監視  | surveillance    | B    | ✓    |
| 監視  | monitor         | G    | ✓    |
| 直立  | upright         | B    | ✓    |
| 相似  | similarity      | M    | ✓    |
| 相似  | resemblance     | M    | ✓    |
| 相似  | similar         | B    | ✓    |
| 省份  | province        | B    | ✓    |
| 省份  | provinces       | B    | ✓    |
| 眼皮  | eyelid          | M    | ✓    |
| 眼皮  | eyelids         | B    | ✓    |
| 瞬時  | instantaneous   | B    | ✓    |
| 瞬時  | instantaneously | G    | ✓    |
| 祝願  | wish            | M    | ✓    |
| 祝願  | wishes          | B    | ✓    |
| 移交  | handover        | M    | ✓    |
| 移交  | transferred     | G    | ✓    |
| 篩選  | filters         | M    | ✓    |
| 篩選  | screening       | B    | ✓    |
| 篩選  | filter          | M    | ✓    |
| 篩選  | filtering       | M    | ✓    |
| 簽字  | signature       | M    | ✓    |
| 簽字  | signed          | G    | ✓    |
| 簽字  | sign            | B    | ✓    |
| 籃球  | basketball      | B    | ✓    |
| 紀念館 | memorial        | B    | ✓    |
| 紀念館 | memorials       | G    | ✓    |
| 紅寶石 | ruby            | B    | ✓    |
| 紅寶石 | rubies          | M    | ✓    |
| 納米  | nano            | M    | ✗    |
| 納米  | nm              | G    | ✓    |
| 納米  | nanometer       | G    | ✓    |
| 納米  | nanometers      | G    | ✓    |
| 素描  | sketch          | B    | ✓    |
| 素描  | sketching       | M    | ✓    |
| 素描  | sketches        | M    | ✓    |
| 素描  | drawings        | G    | ✓    |
| 綻放  | blooming        | M    | ✓    |
| 綻放  | blossom         | G    | ✓    |
| 綻放  | bloom           | B    | ✓    |
| 綻放  | blossoming      | M    | ✓    |

Continued on next column

Table 11, Continued from previous column

| zh   | en                | Src. | Acc. |
|------|-------------------|------|------|
| 繁殖   | reproduction      | B    | ✓    |
| 繁殖   | breed             | B    | ✓    |
| 繁殖   | breeding          | B    | ✓    |
| 繁殖   | propagation       | M    | ✓    |
| 繁殖   | reproduce         | G    | ✓    |
| 繩索   | ropes             | G    | ✓    |
| 繩索   | rope              | B    | ✓    |
| 罌粟   | poppy             | B    | ✓    |
| 罌粟   | poppies           | M    | ✓    |
| 義大利文 | italian           | B    | ✓    |
| 肉汁   | gravy             | B    | ✓    |
| 肚臍   | belly             | G    | ✗    |
| 肚臍   | navel             | B    | ✓    |
| 腎    | kidney            | B    | ✓    |
| 腎    | renal             | B    | ✓    |
| 腎    | kidneys           | B    | ✓    |
| 臼齒   | molar             | M    | ✓    |
| 花花公子 | playboy           | M    | ✓    |
| 花花公子 | dude              | M    | ✓    |
| 萎縮   | atrophy           | B    | ✓    |
| 萎縮   | shrinking         | B    | ✓    |
| 蒸    | steamed           | B    | ✓    |
| 蒸    | steaming          | B    | ✓    |
| 蓬    | pont              | M    | ✗    |
| 虛擬   | virtual           | B    | ✓    |
| 蠶    | silkworm          | M    | ✓    |
| 蠶    | silkworms         | G    | ✓    |
| 行為   | behavioral        | G    | ✓    |
| 行為   | behavior          | B    | ✓    |
| 行為   | conduct           | M    | ✓    |
| 行為   | behaviors         | B    | ✓    |
| 行為   | behaviour         | B    | ✓    |
| 裝潢   | decorating        | M    | ✓    |
| 要麼   | either            | B    | ✓    |
| 觀測   | observing         | M    | ✓    |
| 觀測   | observations      | G    | ✓    |
| 觀測   | observation       | B    | ✓    |
| 觀測   | observed          | G    | ✓    |
| 觀測   | observational     | B    | ✓    |
| 訂約   | tendering         | G    | ✗    |
| 訂約   | contracting       | M    | ✓    |
| 詩句   | verses            | B    | ✓    |
| 詩句   | verse             | M    | ✓    |
| 誤會   | misunderstanding  | B    | ✓    |
| 誤會   | mistaken          | G    | ✓    |
| 誤會   | misunderstandings | G    | ✓    |
| 負擔得起 | affordable        | B    | ✓    |
| 貸方   | lenders           | B    | ✓    |
| 貸方   | lender            | M    | ✓    |
| 越野車  | suv               | M    | ✗    |
| 跳舞   | dancing           | B    | ✓    |

Continued on next column

Table 11, Continued from previous column

| zh  | en             | Src. | Acc. |
|-----|----------------|------|------|
| 跳舞  | dance          | B    | ✓    |
| 輸入  | input          | B    | ✓    |
| 輸入  | inputs         | G    | ✓    |
| 輸入  | enter          | M    | ✓    |
| 轉型  | transition     | B    | ✓    |
| 轉型  | transformation | B    | ✓    |
| 辯論  | debate         | B    | ✓    |
| 辯論  | debates        | B    | ✓    |
| 辯論  | debating       | M    | ✓    |
| 農   | nong           | M    | ✗    |
| 通過  | via            | B    | ✓    |
| 通過  | pass           | M    | ✓    |
| 通過  | through        | B    | ✓    |
| 通過  | passed         | G    | ✓    |
| 遊牧  | nomadic        | B    | ✓    |
| 遊牧  | nomad          | M    | ✓    |
| 過渡性 | transitional   | B    | ✓    |
| 遺囑  | wills          | B    | ✓    |
| 遺囑  | testament      | G    | ✓    |
| 邊界  | boundary       | B    | ✓    |
| 邊界  | boundaries     | B    | ✓    |
| 邊界  | border         | B    | ✓    |
| 邊界  | borders        | B    | ✓    |
| 重複  | duplicate      | M    | ✓    |
| 重複  | repeated       | G    | ✓    |
| 重複  | repeat         | G    | ✓    |
| 重複  | repeats        | G    | ✓    |
| 重複  | repeating      | G    | ✓    |
| 金庫  | treasury       | B    | ✓    |
| 金庫  | vault          | M    | ✓    |
| 金庫  | vaults         | G    | ✓    |
| 開講  | newslines      | M    | ✗    |
| 關稅  | tariffs        | B    | ✓    |
| 關稅  | customs        | M    | ✓    |
| 關稅  | tariff         | B    | ✓    |
| 關節炎 | arthritis      | B    | ✓    |
| 降低  | reduce         | G    | ✓    |
| 降低  | lowering       | G    | ✓    |
| 降低  | reduced        | G    | ✓    |
| 降低  | decrease       | B    | ✓    |
| 雀斑  | freckles       | M    | ✓    |
| 雄心  | ambitious      | M    | ✓    |
| 雄心  | ambition       | B    | ✓    |
| 雄心  | ambitions      | B    | ✓    |
| 雄蕊  | stamens        | B    | ✓    |
| 雄蕊  | petals         | G    | ✗    |
| 青色  | cyan           | M    | ✓    |
| 鞋底  | soles          | M    | ✓    |
| 鞋類  | footwear       | B    | ✓    |
| 鞋類  | shoes          | G    | ✓    |
| 飛行員 | pilot          | B    | ✓    |

Continued on next column

Table 11, Continued from previous column

| zh  | en          | Src. | Acc. |
|-----|-------------|------|------|
| 飛行員 | pilots      | G    | ✓    |
| 食物  | food        | B    | ✓    |
| 食物  | foods       | B    | ✓    |
| 餘燼  | embers      | M    | ✓    |
| 體   | body        | M    | ✗    |
| 高貴  | noble       | B    | ✓    |
| 魅力  | charisma    | B    | ✓    |
| 魅力  | charm       | B    | ✓    |
| 魅力  | glamour     | B    | ✗    |
| 魅力  | charismatic | G    | ✓    |
| 鯊魚  | sharks      | B    | ✓    |
| 鯊魚  | shark       | B    | ✓    |
| 鵝   | goose       | B    | ✓    |
| 鵝   | geese       | B    | ✓    |
| 鹵素  | halogens    | G    | ✓    |
| 鹵素  | halogen     | B    | ✓    |
| 黑猩猩 | chimps      | M    | ✓    |
| 黑猩猩 | chimpanzee  | B    | ✓    |
| 黑猩猩 | chimp       | M    | ✓    |
| 黑猩猩 | chimpanzees | B    | ✓    |
| 點頭  | nod         | B    | ✓    |
| 齋戒  | fasting     | B    | ✓    |
| 齋戒  | ramadan     | G    | ✗    |

End of Table.
